# Supplementary material for: The Function of Drosophila USP14 in Endoplasmic Reticulum Stress and Retinal Degeneration in a Model for Autosomal Dominant Retinitis Pigmentosa
Source: MDPI journal article supplement (doi:10.3390/biology9100332), 2020-10-12
Supplement: s1 [file s1]

# The Function of *Drosophila* USP14 in Endoplasmic Reticulum Stress and Retinal Degeneration in a Model for Autosomal Dominant Retinitis Pigmentosa

Jung-Eun Park, Thị Xuân Thùy Trần, Nayoung Park, Jeonghun Yeom, Kyunggon Kim and Min-Ji Kang

## Supplementary Materials

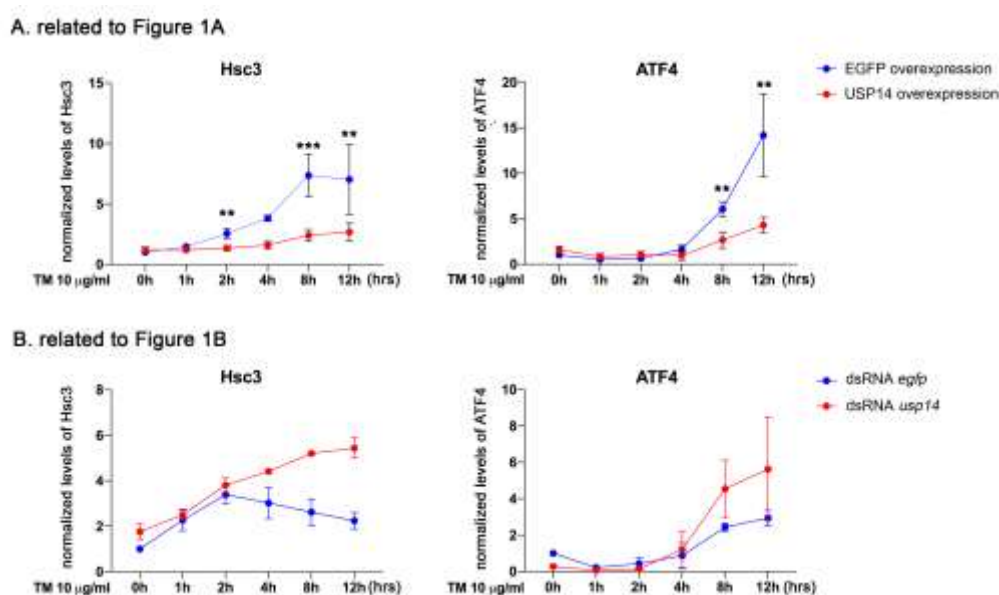

**Figure S1.** Quantification of the normalized Hsc3 or ATF4 band intensity, using ImageJ software. Error bars,  $\pm$  SEM. (a)  $n > 3$ . The p values were calculated using Student's t test: \*\*  $P < 0.05$ , \*\*\*  $P < 0.001$ . (b)  $n = 2$ .

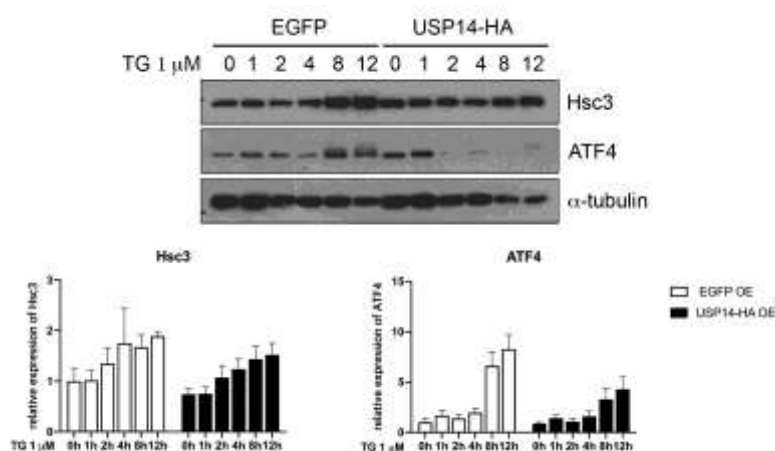

**Figure S2.**

Overexpression of USP14 decreased the levels of thapsigargin-induced ER stress. (a) Control cells (EGFP overexpressing) and USP14 overexpressing S2 cells were treated with 1  $\mu$ M thapsigargin (TG) for the indicated intervals, and the extracts were analyzed for the expression of hsc3, ATF4, and  $\alpha$ -tubulin using immunoblotting. (b) Quantification of the average normalized hsc3 or ATF4 band intensity using ImageJ. Error bars,  $\pm$  SEM.

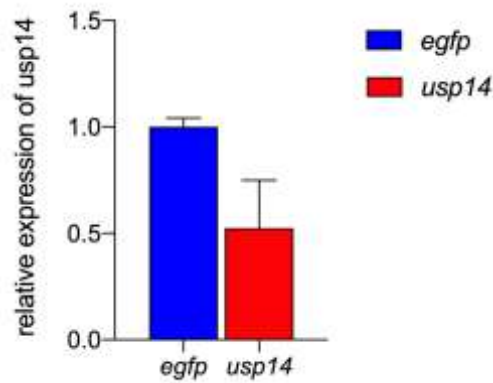

**Figure S3.** Knockdown efficiency of *usp14* in *Drosophila* S2 cells As a control, RNAi against *egfp* was used. Error bars,  $\pm$  SEM.

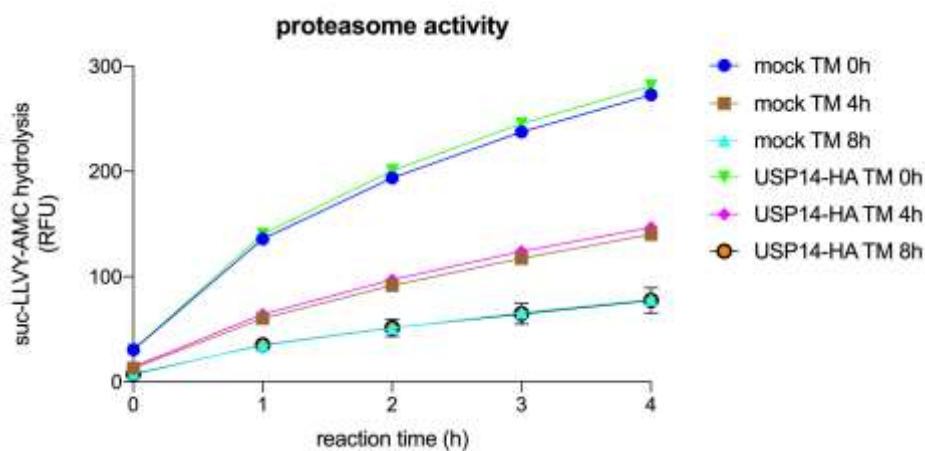

**Figure S4.** Kinetic measurement of proteasome activity. (a and b) *Drosophila* S2 cells expressing enhanced green fluorescent protein (EGFP, control) or USP14-HA were treated with 10  $\mu$ g/ml tunicamycin (TM) for the indicated intervals. Proteasome activity was measured based on the hydrolysis of the Suc-LLVY-AMC fluorogenic substrate at the indicated time points in tunicamycin-treated *Drosophila* S2 cells. The values were normalized to basal activity, which was determined upon treatment with 20  $\mu$ M MG132. RFU, relative fluorescence units.

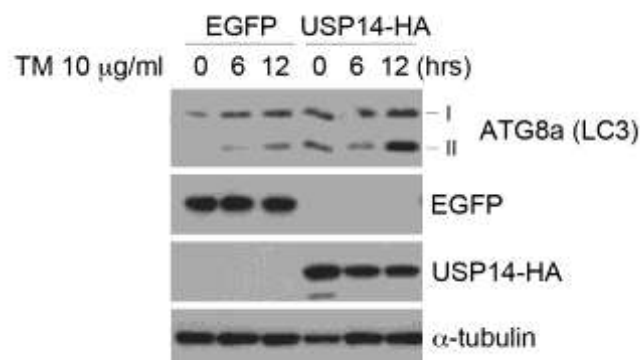

**Figure S5.** USP14 overexpression resulted in increased levels of Atg8a-II. *Drosophila* S2 cells were transfected with either EGFP (lanes 1–3) or USP14 (lanes 4–6) and treated with 10  $\mu$ g/ml tunicamycin (TM) for the indicated intervals. The induction of autophagy was detected using the anti-Atg8 antibody. The increase in Atg8a-II levels was enhanced in USP14-overexpressing S2 cells.

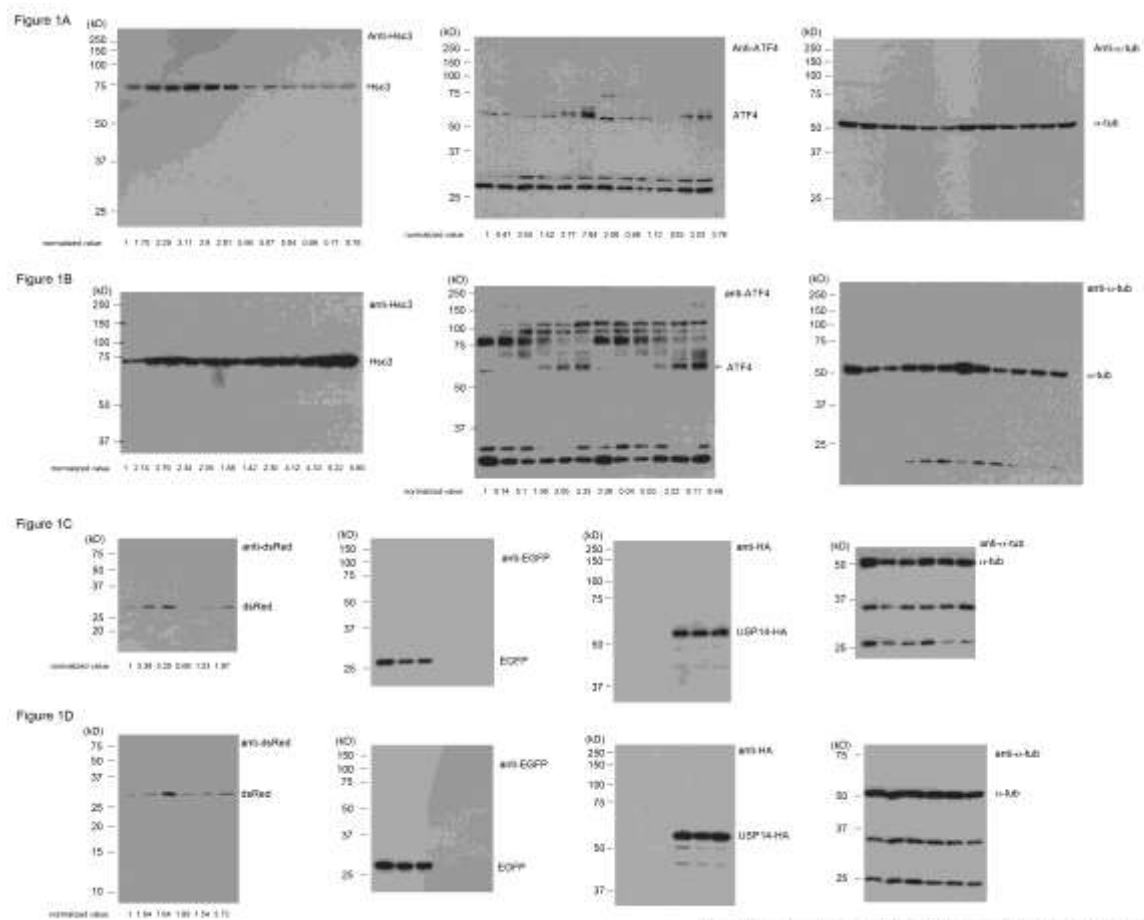

Supplementary Figure 6a, related to Figure 1

Figure 2A

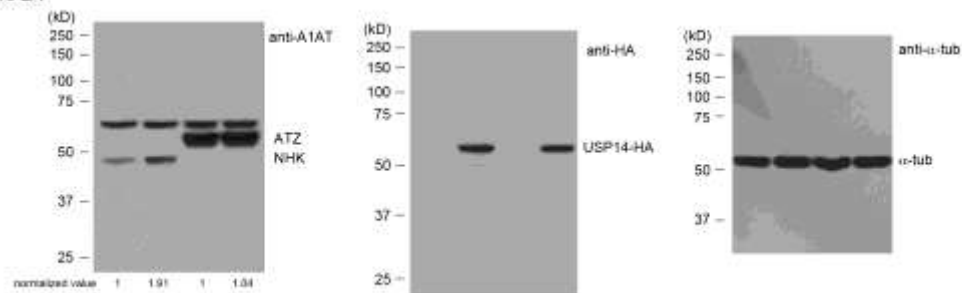

Figure 2B

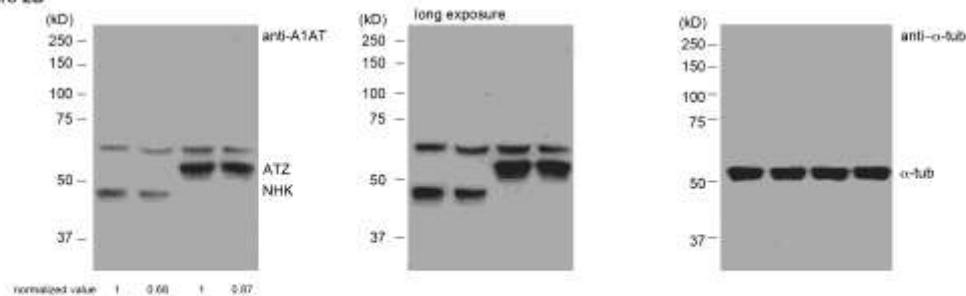

Figure 2C

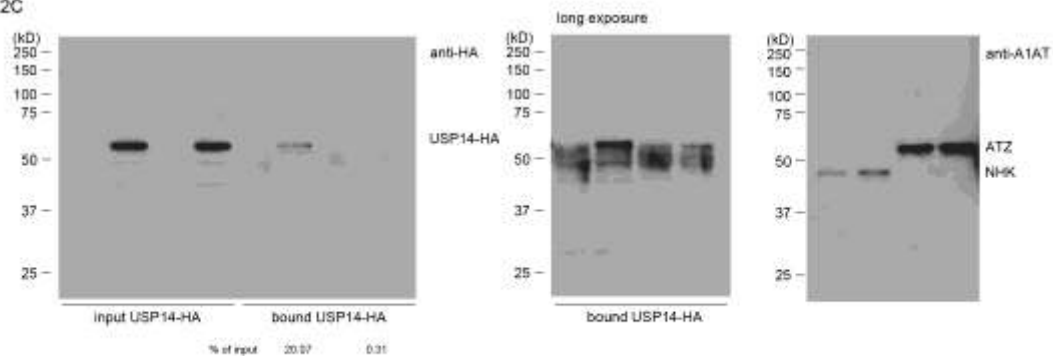

Supplementary Figure 6b, related to Figure 2

Figure 3A

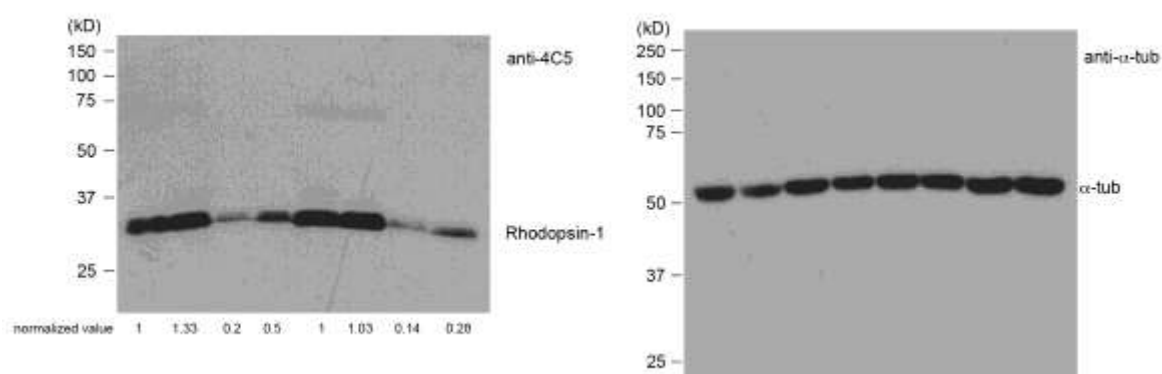

Figure 3C

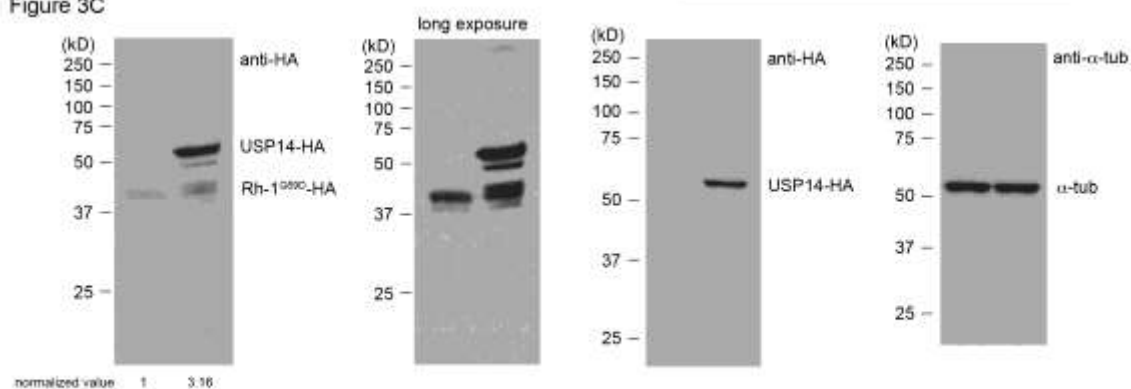

Supplementary Figure 6c, related to Figure 3

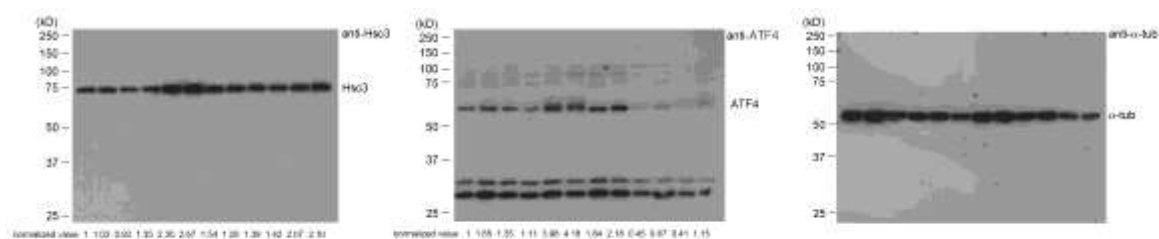

Supplementary Figure 6d, related to Figure S2

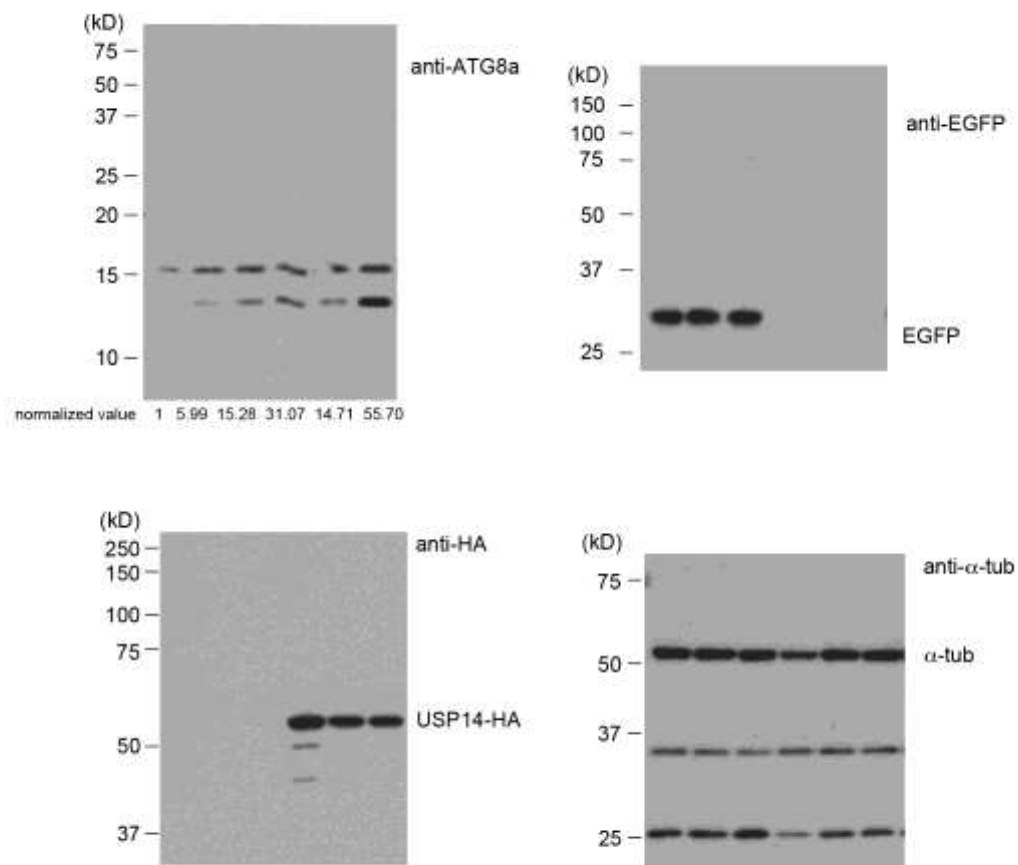

## Supplementary Figure 6e, related to Figure S5

**Figure S6.** Densitometric analyses and whole images of representative membranes for all of the Western blots.
